# Supplementary material for: Chromatin looping and eRNA transcription precede the transcriptional activation of gene in the β-globin locus
Source: PubMed Central journal article supplement (PMC4370096; doi:10.1042/bsr20140126), 2015-03-18
Supplement: bsr035e179ntsadd.pdf [file bsr035e179ntsadd.pdf]

Supplementary Table 1. Primers of 3C

| Amplicon | Primers                               |
|----------|---------------------------------------|
| HS out   | 5' TTG CAT GAT AAA CGT GAA TGA A 3'   |
| HS6      | 5' CTG ACT CAG TTC CTT GGA AGA 3'     |
| HS5/4    | 5' CGG AAG AAA TCA CTC CTG CT 3'      |
| HS3      | 5' AGC CTT CCT CTC TGC CTT GT 3'      |
| HS3 3'   | 5' AAG GGC AGG GAC TGC TTA TC 3'      |
| HS2      | 5' GCA AGG CTG TTA TCC CTT T 3'       |
| HS2 3'   | 5' TGG CTT GTG CTG TAA GAT CG 3'      |
| HS1      | 5' AAA GCC ATT CTG AAA GTA AG 3'      |
| ey 3'    | 5' TCC CAG AGT TTC TCC TCC AA 3'      |
| β maj    | 5' CTC AAT CAA CTA CTG AAT TGG TGT 3' |
